# Supplementary material for: Insertion and deletion evolution reflects antibiotics selection pressure in a Mycobacterium tuberculosis outbreak
Source: PLoS Pathog. 2020 Sep 30;16(9):e1008357. doi: 10.1371/journal.ppat.1008357 (PMC7549793; doi:10.1371/journal.ppat.1008357)
Supplement: S6 Table — “Parsimony informative” states whether the variant considered is parsimony informative (Yes) or not (No). “Parsimony score” gives the minimum number of events required to explain the evolution of the variant on the phylogeny. “# SNPs in gene” gives the number of SNPs found in the gene considered. “Position in gene” describes the localization of variants in coding regions by the gene coordinates. The essential category can be either essential (i.e., the gene is required for growth in vitro) or dispensable (i.e., the gene is not required for growth in vitro). “Antibiotic resistance” describes whether the gene has been found to confer antibiotic resistance upon substitutions (“Res”, according to S2 Table) or not (“NRes”). (XLSX) [file ppat.1008357.s014.xlsx]

## Sheet: Table S6
Position	Variant	Length	Parsimony informative	Parsimony score	# SNPs in gene	Locus tag	Position in gene	H37Rv homolog	Strand	Essentiality	Antibiotic resistance	Product
759022	Insertion	6	No	1	33	MT49_RS03490	284	Rv0667	+	Essential	Res	DNA-directed RNA polymerase subunit beta
760034	Insertion	3	No	1	33	MT49_RS03490	1296	Rv0667	+	Essential	Res	DNA-directed RNA polymerase subunit beta
839570	Insertion	8	No	1	0	MT49_RS03910	2075	Rv0747	+	Dispensable	NRes	PE family protein
839573	Deletion	7	No	1	0	MT49_RS03910	2078-2084	Rv0747	+	Dispensable	NRes	PE family protein
977411	Insertion	60	No	1	0	MT49_RS04625	32	Rv0880	+	Dispensable	NRes	MarR family transcriptional regulator
977411	Insertion	1358	No	1	0	MT49_RS04625	32	Rv0880	+	Dispensable	NRes	MarR family transcriptional regulator
1187559	Insertion	5	Yes	1	0	MT49_RS05650	680	Rv1067c	-	Dispensable	NRes	PE family protein
1187661	Insertion	3	Yes	1	0	MT49_RS05650	782	Rv1067c	-	Dispensable	NRes	PE family protein
1211809	Deletion	9	Yes	1	0	MT49_RS05750	1626-1634	Rv1087	+	Dispensable	NRes	PE family protein
1212205	Deletion	3	Yes	2	0	MT49_RS05750	2022-2024	Rv1087	+	Dispensable	NRes	PE family protein
1510468	Deletion	2	No	1	0	MT49_RS07125	36-37	Rv1344	+	Dispensable	NRes	acyl carrier protein
1510472	Insertion	3	No	1	0	MT49_RS07125	40	Rv1344	+	Dispensable	NRes	acyl carrier protein
1912313	Insertion	2	No	1	2	MT49_RS08875	268	Rv1694	+	Dispensable	Res	16S/23S rRNA (cytidine-2'-O)-methyltransferase TlyA
1912614	Insertion	1	No	1	2	MT49_RS08875	569	Rv1694	+	Dispensable	Res	16S/23S rRNA (cytidine-2'-O)-methyltransferase TlyA
2251488	Insertion	3	No	1	0	MT49_RS10535	197	NA	+	Dispensable	NRes	IS110 family transposase
2251619	Deletion	30	No	1	0	MT49_RS10535	328-357	NA	+	Dispensable	NRes	IS110 family transposase
2284324	Deletion	1605	Yes	2	0	MT49_RS10705	646	Rv2041c	-	Dispensable	NRes	sugar ABC transporter substrate-binding protein
2284410	Deletion	1814	No	1	0	MT49_RS10705	732	Rv2041c	-	Dispensable	NRes	sugar ABC transporter substrate-binding protein
2285901	Insertion	63	No	1	0	MT49_RS10715	69	Rv2043c	-	Dispensable	Res	bifunctional pyrazinamidase/nicotinamidase
2285901	Deletion	1238	No	1	0	MT49_RS10715	69	Rv2043c	-	Dispensable	Res	bifunctional pyrazinamidase/nicotinamidase
2285929	Insertion	1	No	1	0	MT49_RS10715	97	Rv2043c	-	Dispensable	Res	bifunctional pyrazinamidase/nicotinamidase
2285933	Insertion	1	No	1	0	MT49_RS10715	101	Rv2043c	-	Dispensable	Res	bifunctional pyrazinamidase/nicotinamidase
2286058	Insertion	1	No	1	0	MT49_RS10715	226	Rv2043c	-	Dispensable	Res	bifunctional pyrazinamidase/nicotinamidase
2286202	Deletion	10	No	1	0	MT49_RS10715	370-379	Rv2043c	-	Dispensable	Res	bifunctional pyrazinamidase/nicotinamidase
2286208	Insertion	1	No	1	0	MT49_RS10715	376	Rv2043c	-	Dispensable	Res	bifunctional pyrazinamidase/nicotinamidase
2610662	Insertion	1358	Yes	1	0	MT49_RS21475	303	NA	+	Dispensable	NRes	hypothetical protein
2610752	Insertion	1358	Yes	1	0	MT49_RS21475	393	NA	+	Dispensable	NRes	hypothetical protein
2610752	Insertion	3304	Yes	1	0	MT49_RS21475	393	NA	+	Dispensable	NRes	hypothetical protein
3299054	Insertion	1359	No	1	0	MT49_RS15540	128	Rv2958c	-	Dispensable	NRes	PGL/p-HBAD biosynthesis glycosyltransferase
3299160	Deletion	4091	No	1	0	MT49_RS15540	234	Rv2958c	-	Dispensable	NRes	PGL/p-HBAD biosynthesis glycosyltransferase
3545241	Insertion	1358	No	1	0	MT49_RS16775	67	Rv3183	+	Dispensable	NRes	transcriptional regulator
3545312	Insertion	2	No	1	0	MT49_RS16775	138	Rv3183	+	Dispensable	NRes	transcriptional regulator
3738081	Deletion	9	No	1	0	MT49_RS17645	3860-3868	NA	-	Dispensable	NRes	PE family protein
3738228	Deletion	9	No	1	0	MT49_RS17645	4007-4015	NA	-	Dispensable	NRes	PE family protein
4326886	Deletion	1	No	1	17	MT49_RS20315	127	Rv3854c	-	Dispensable	Res	FAD-containing monooxygenase EthA
4327472	Deletion	1	No	1	17	MT49_RS20315	713	Rv3854c	-	Dispensable	Res	FAD-containing monooxygenase EthA
4328091	Deletion	2	No	1	17	MT49_RS20315	1332-1333	Rv3854c	-	Dispensable	Res	FAD-containing monooxygenase EthA
4328119	Deletion	1	Yes	1	17	MT49_RS20315	1360	Rv3854c	-	Dispensable	Res	FAD-containing monooxygenase EthA
4362136	Deletion	1	No	1	0	MT49_RS20450	750	Rv3881c	-	Dispensable	NRes	type VII secretion system ESX-1 target EspB
4362253	Insertion	1	No	1	0	MT49_RS20450	867	Rv3881c	-	Dispensable	NRes	type VII secretion system ESX-1 target EspB
